# Supplementary material for: Neural transcriptome reveals molecular mechanisms for temporal control of vocalization across multiple timescales
Source: PubMed Central journal article supplement (PMC4446069; doi:10.1186/s12864-015-1577-2), 2015-05-27

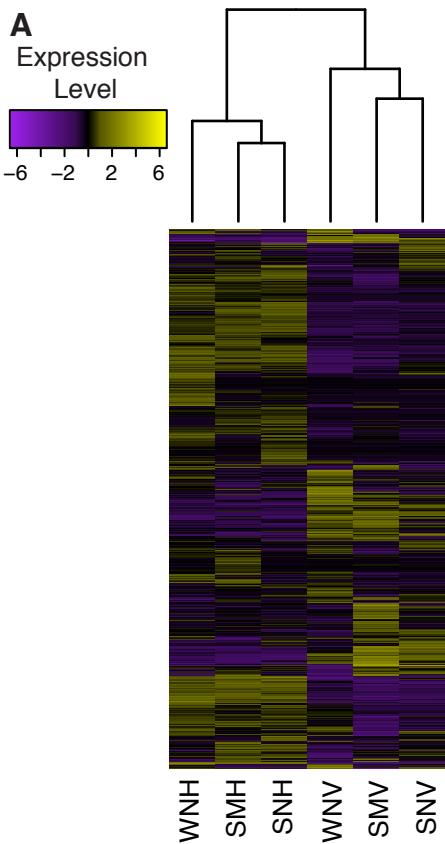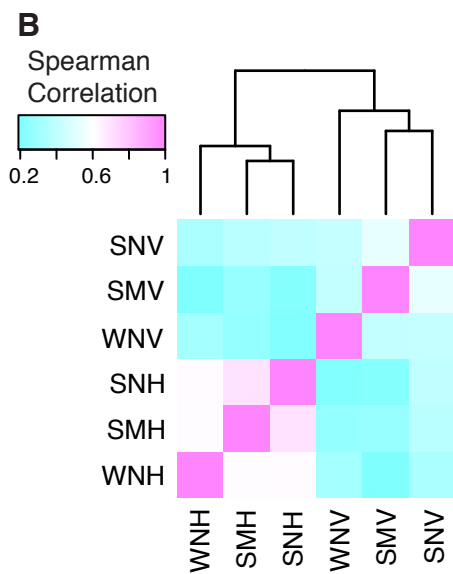

Supplement: 12864_2015_1577_MOESM3_ESM.pdf [file 12864_2015_1577_MOESM3_ESM.pdf]
